# Supplementary material for: Mobile MAX-DOAS observations of tropospheric NO 2 and HCHO during summer over the Three Rivers' Source region in China
Source: Copernicus journal article supplement (doi:10.5194/acp-23-3655-2023), 2023-03-27
Supplement: Supplementary file 1 [file acp-23-3655-2023-supplement.pdf]

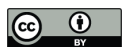

*Supplement of*

## **Mobile MAX-DOAS observations of tropospheric NO<sub>2</sub> and HCHO during summer over the Three Rivers' Source region in China**

**Siyang Cheng et al.**

*Correspondence to:* Jianzhong Ma ([majz@cma.gov.cn](mailto:majz@cma.gov.cn)) and Xinghong Cheng ([cxingh@cma.gov.cn](mailto:cxingh@cma.gov.cn))

The copyright of individual parts of the supplement might differ from the article licence.

## S1 Radiative transfer simulations

We explored the applicability of the geometric approximation method by radiative transfer simulations. According to the AODs from the AERONET website (<https://aeronet.gsfc.nasa.gov>, last access: 2 December 2022) at three sites (Mt\_WLG, NAM\_CO, QOMS\_CAS) over the Tibetan Plateau, we estimate the AODs around 0.1 during our field campaign. But similar results are also found for AODs of 0.05 and 0.2. The simulations were performed with the full spherical Monte Carlo radiative transfer model MCARTIM (Deutschmann et al., 2011). The simulation scheme is as the following.

**Table S1.** Assumptions made for the radiative transfer simulations to test the applicability of the geometric approximation.

| Parameters                       | O <sub>4</sub>         | NO <sub>2</sub>     | HCHO     |
|----------------------------------|------------------------|---------------------|----------|
| Wavelength (nm)                  | 340                    | 440                 | 340      |
| Layer height (km)                | US standard atmosphere | 0-1; 0-2            | 0-1; 0-2 |
| Aerosol height (km)              | 0-1                    | same as trace gases |          |
| AOD                              | 0; 0.05; 0.1; 0.2      |                     |          |
| Aerosol single scattering albedo | 0.95                   |                     |          |
| Aerosol asymmetry parameter      | 0.68                   |                     |          |
| Cloud single scattering albedo   | 1.0                    |                     |          |
| Cloud asymmetry parameter        | 0.85                   |                     |          |
| Cloud altitude (km)              | 2-3; 4-5; 8-9          |                     |          |
| SZA (°)                          | 20; 40; 60; 70; 80     |                     |          |
| RAA (°)                          | 10; 30; 60; 90; 180    |                     |          |
| Elevation angle (°)              | 15                     |                     |          |
| Terrain height (km)              | 2; 3; 4; 5             |                     |          |

The VCD ratios of the RTM simulations and the geometric approximation for 15° elevation angle under the condition of AOD=0.1 can be obtained for O<sub>4</sub>, NO<sub>2</sub>, and HCHO, respectively. The DAMF ratios' means and standard deviations for all geometries (blue symbols) and RAA=10°, SZA=60° and RAA=10°, SZA=70° excluded (red symbols, for these rare measurement scenarios the strongest errors

occur) are shown below. The main findings are: (1) The typical errors of the geometric approximation are <20% for NO<sub>2</sub> and HCHO; (2) The errors of the geometric approximation are much larger for O<sub>4</sub> with a systematic underestimation between about 40% and 60%. This underestimation is caused by the low sensitivity for high altitudes (Fig. S1, S3); (3) The large underestimation of the O<sub>4</sub> VCDs indicates that O<sub>4</sub> can not be used for the test if the geometric approximation is justified or not for an individual measurement of NO<sub>2</sub> and HCHO. It should also be noted that HCHO is not only present in the lowest atmospheric layers, but background HCHO levels extend to higher altitudes. We investigated the sensitivity of the geometric approximation also to HCHO concentrations at altitudes above 2km. For that purpose, we used a HCHO concentration profile above the Tibetan plateau from a global chemistry model (Ma et al., 2019) (Fig. S2). The results are shown in Fig. S3 (bottom). Like for O<sub>4</sub>, the sensitivity to the background HCHO is reduced by about 60%. Thus the retrieved HCHO VCDs using the geometric approximation will well represent the HCHO located below 2km, but will underestimate the total HCHO VCD by about  $8 \times 10^{14}$  molec cm<sup>-2</sup>.

We also investigated the effects of clouds. For that purpose, we assumed clouds with an optical depth of 10 at different altitudes (2-3km, 4-5km, 8-9km). The results for O<sub>4</sub> as well as NO<sub>2</sub> and HCHO are shown in Fig. S4. For HCHO and NO<sub>2</sub> only a small cloud effect (even a small increase of sensitivity) is found. In contrast, for O<sub>4</sub> a strong underestimation is found, especially for clouds at low altitudes.

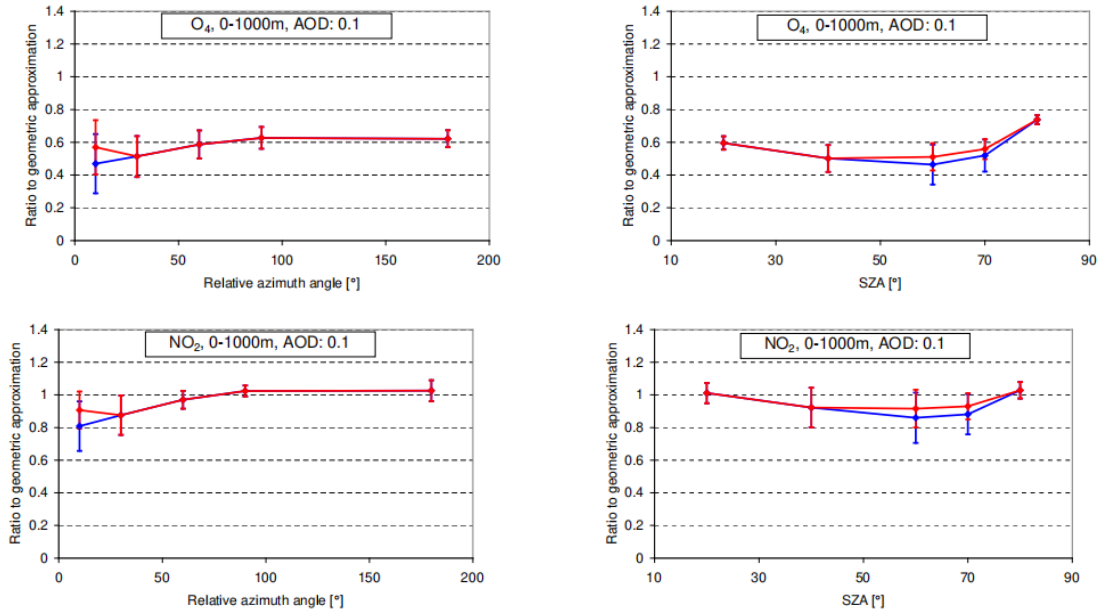

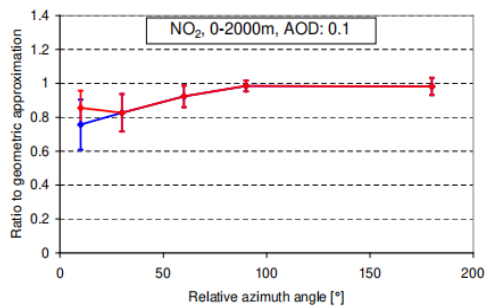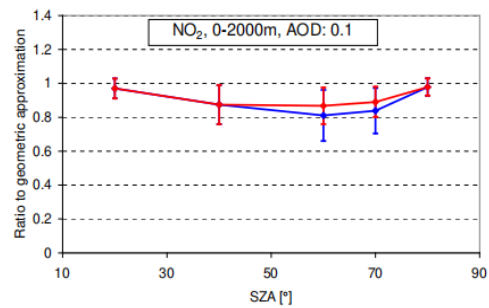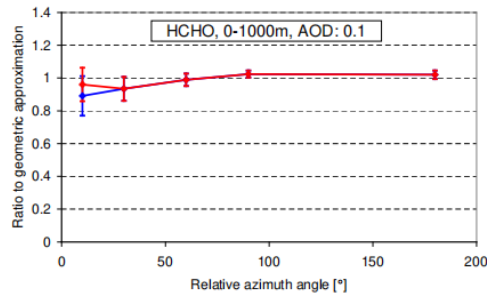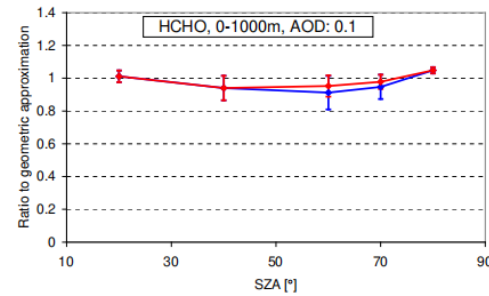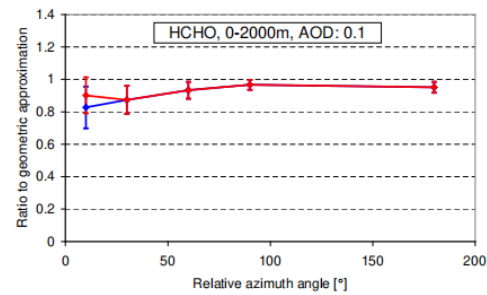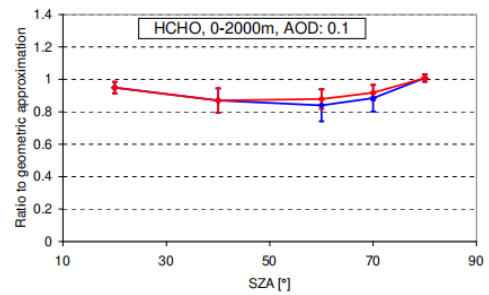

35

40

**Figure S1.** Ratio of the simulated  $DAMF_{15^\circ}$  and the corresponding  $DAMF_{geom, 15^\circ}$  (derived from the geometric approximation). Results are calculated for  $O_4$  as well as for  $NO_2$  and  $HCHO$  with different layer heights. More details of the radiative transfer settings are presented in Table S1. The results in the left and right are the same, but displayed either as function of the relative azimuth angle (RAA) or SZA. Blue curves represent all scenarios, red curves show results with the most ‘problematic scenarios (RAA=10°, SZA=60° and RAA=10°, SZA=70°) excluded. The altitude information in the figures describes the layer height of the aerosols, and for  $NO_2$  and  $HCHO$  also the corresponding trace gas layer heights.

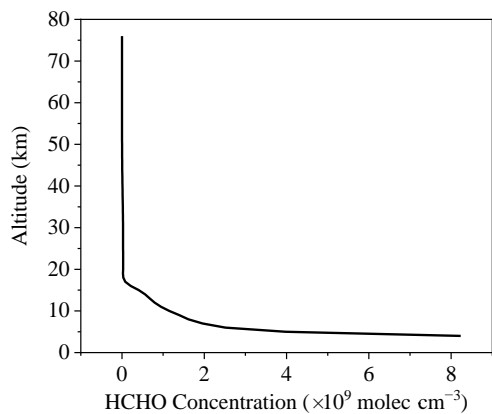

**Figure S2.** Vertical profile of background HCHO over the experimental area (excluding the region of Xi'ning city) from the simulations of the EMAC global chemistry model in July of 2012 (Ma et al., 2019).

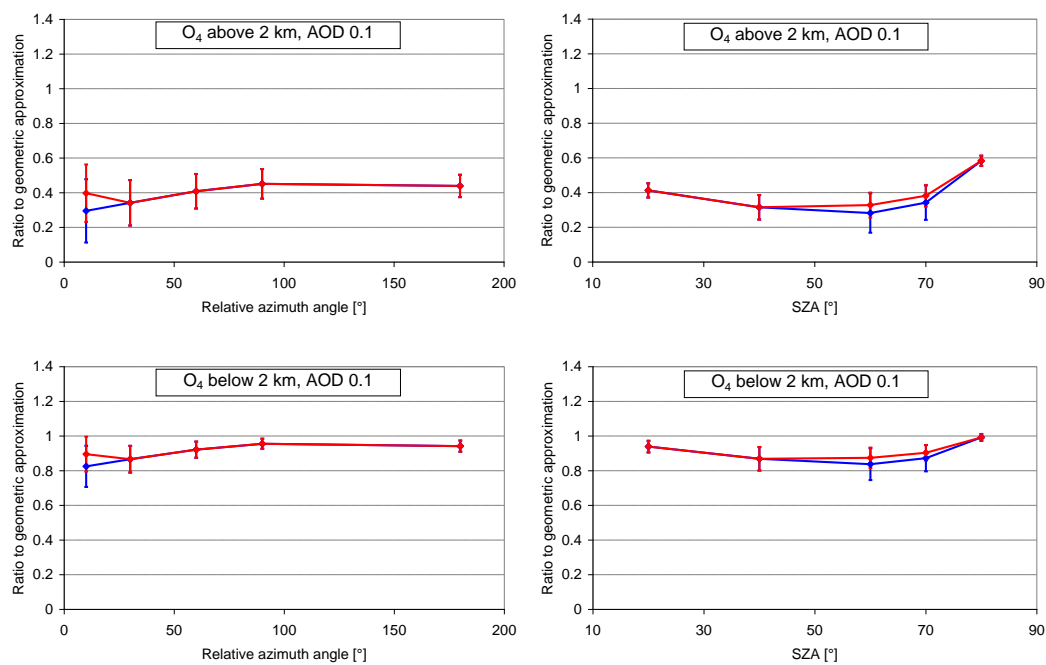

45

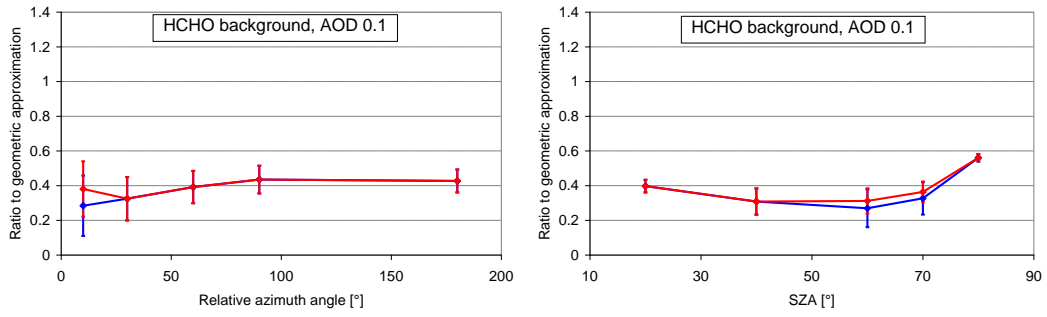

50 **Figure S3.** Ratio of the simulated  $DAMF_{15^\circ}$  and the corresponding  $DAMF_{geom, 15^\circ}$  (derived from the geometric approximation) for the part of the  $O_4$  profile above 2km (top) and below 2km (center). The lower panel shows the results for the HCHO background profile with values below 2km set to zero. The aerosol profile ranged from the surface to 2km altitude.

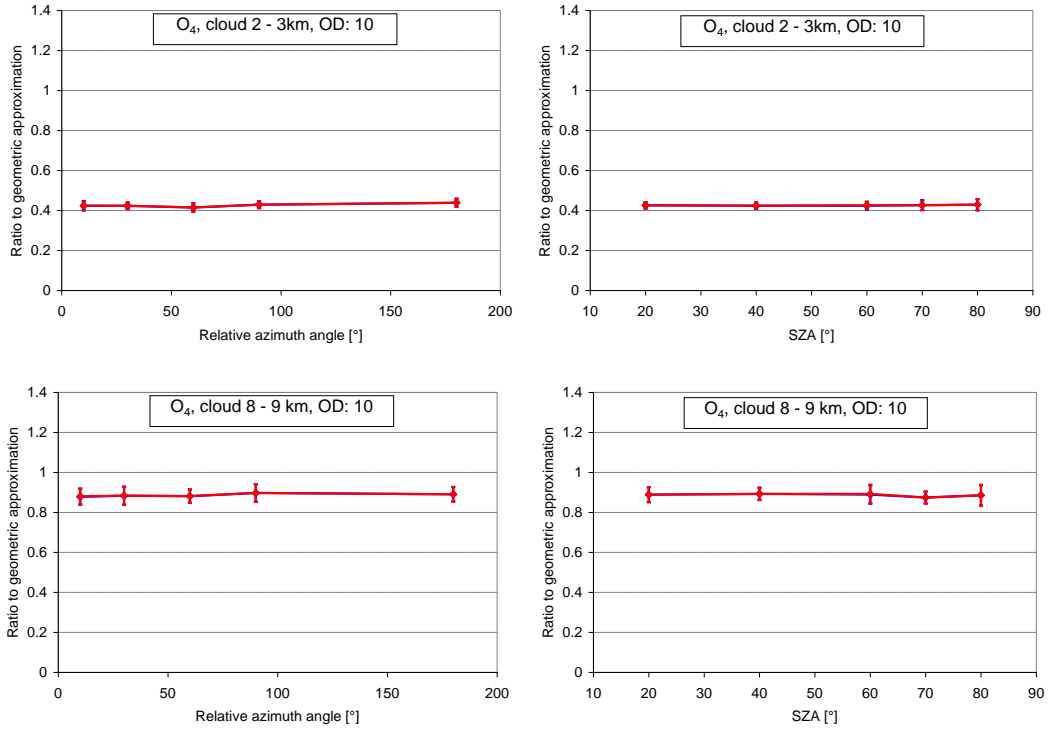

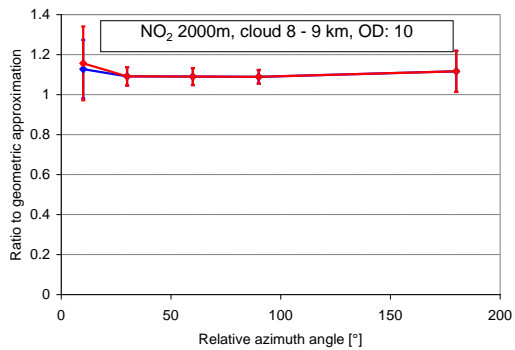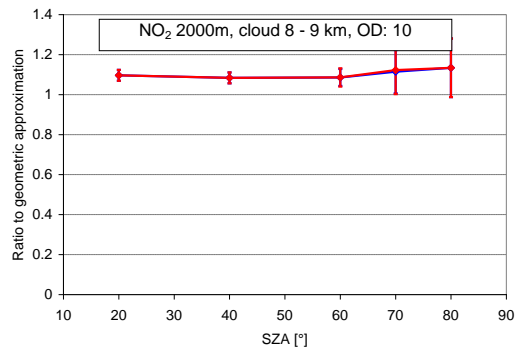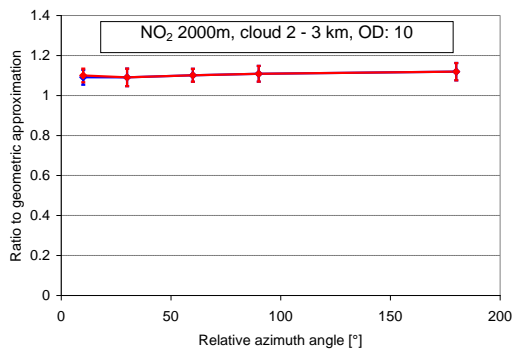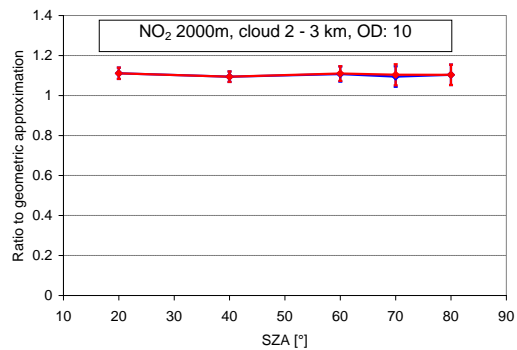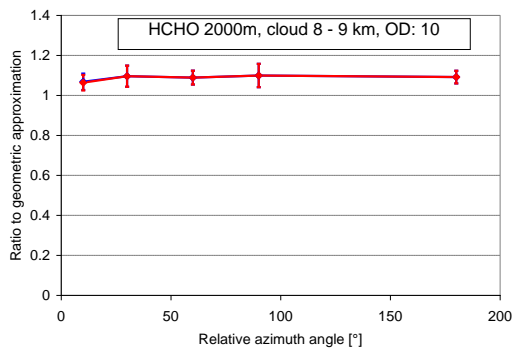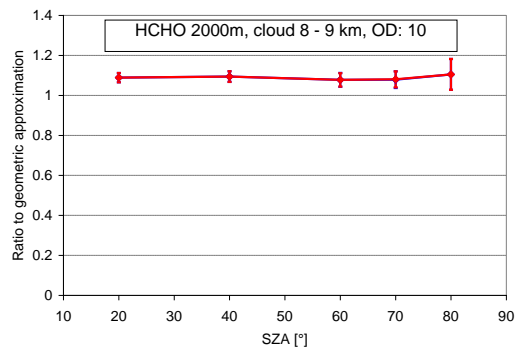

55

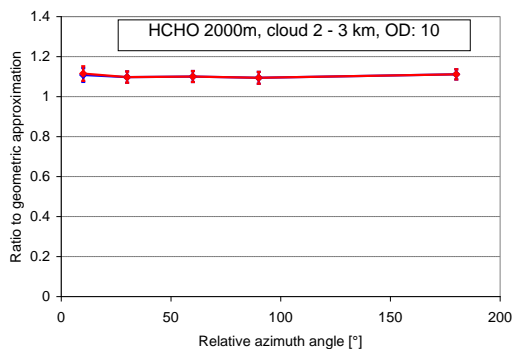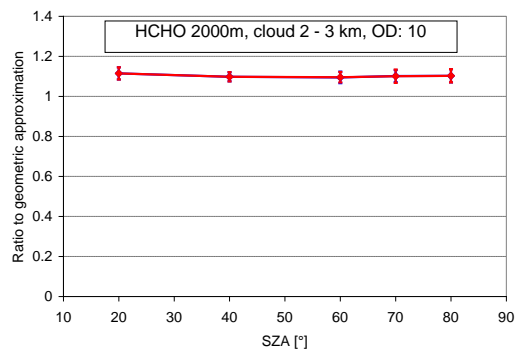

**Figure S4.** Ratio of the simulated  $DAMF_{15^\circ}$  and the corresponding  $DAMF_{geom, 15^\circ}$  (derived from the geometric approximation) in the presence of clouds for  $O_4$  and  $NO_2$  and HCHO located between the surface and 2km.

## S2 Profiles of $NO_2$ and HCHO mixing ratios

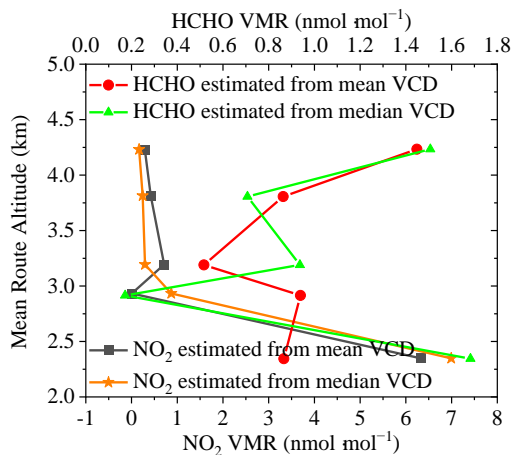

60

**Figure S5.** Profiles of  $NO_2$  and HCHO mixing ratios (VMRs) estimated from the corresponding mean and median VCDs along driving routes respectively.

## S3 Tropospheric $NO_2$ introduced by the stratospheric $NO_2$ absorption

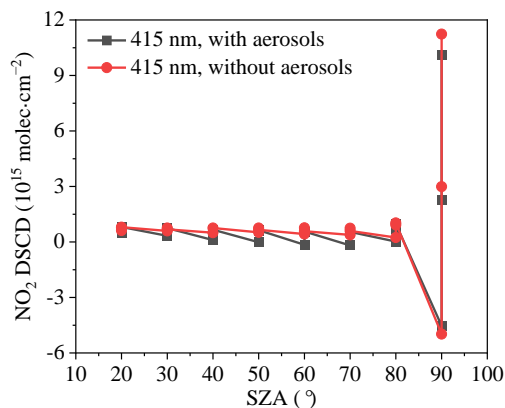

65 **Figure S6.** Simulated apparent tropospheric  $NO_2$  DSCDs at different SZAs, introduced by the stratospheric  $NO_2$  absorption. The conditions during radiative transfer simulations include: (1) Simulation wavelength and elevation angle are set as 415 nm and  $15^\circ$  at an altitude of 4 km for three relative azimuth angles ( $0^\circ$ ;  $90^\circ$ ;  $180^\circ$ ), respectively; (2) The stratospheric  $NO_2$  VCD is assumed to be  $4 \times 10^{15}$  molec  $cm^{-2}$ ; (3) The simulations are performed either without aerosols or with aerosols (aerosols from the surface to 1 km above the surface, AOD=0.1, HG phase function with asymmetry parameter=0.68, single scattering albedo=0.95). The DSCDs represent the differences of the SCDs at  $15^\circ$  and  $90^\circ$  elevations.

70



## S4 Spatial distributions of air temperature at 2 m above the land surface

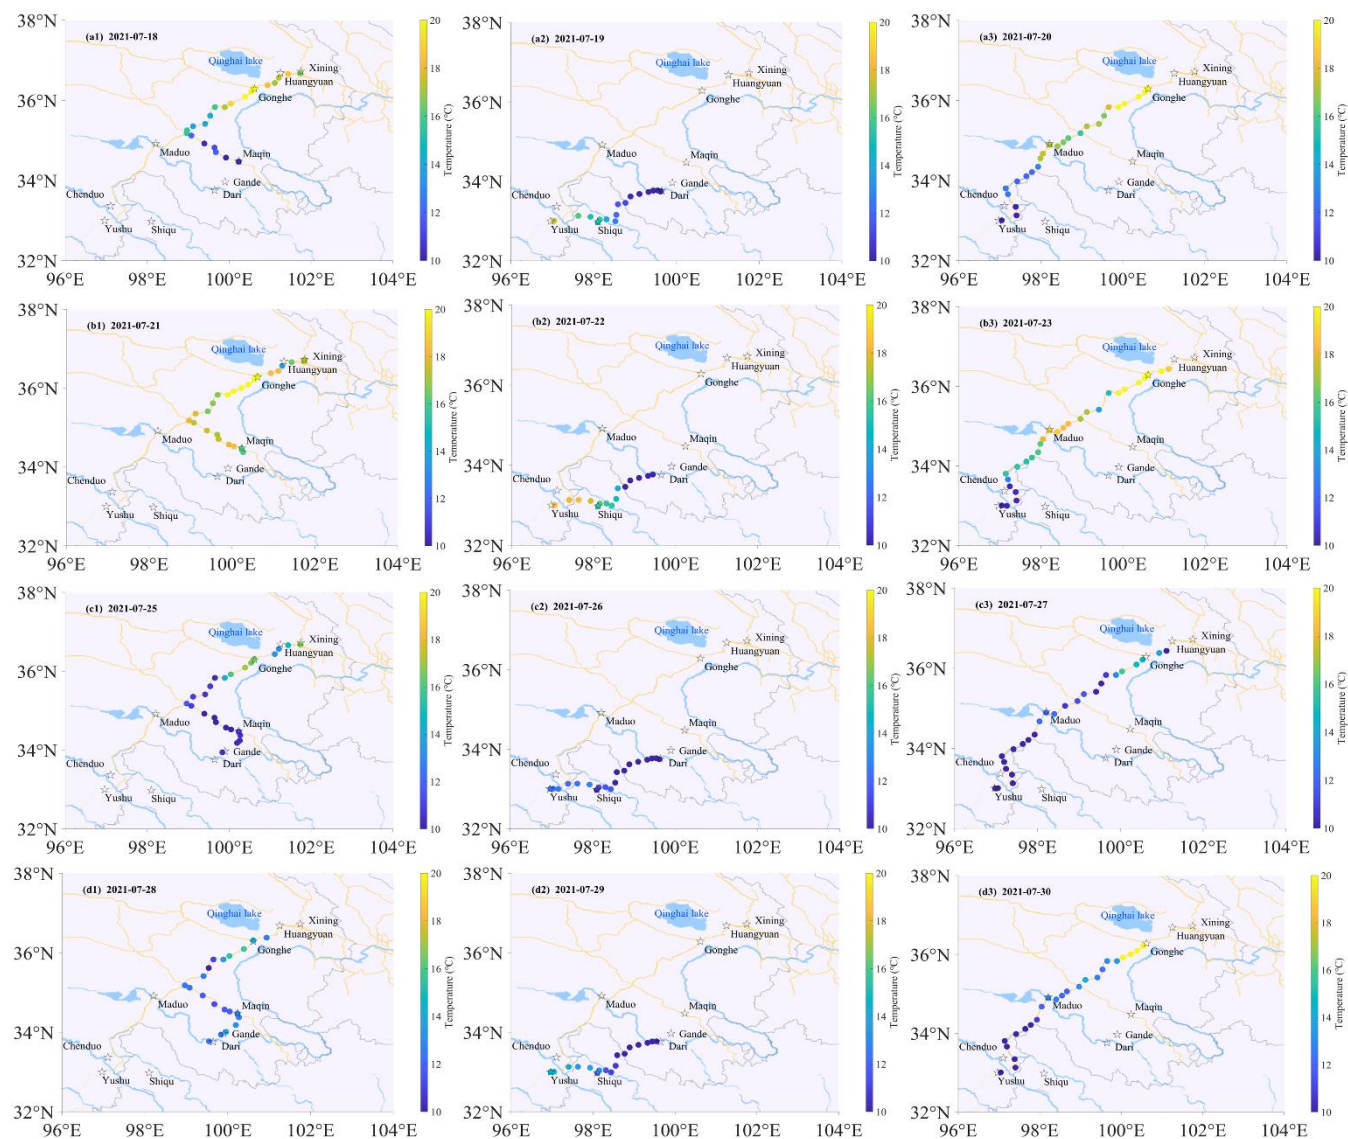

**Figure S7.** Spatial distributions of ERA5 hourly air temperature at 2 m above the land surface, corresponding to gridded HCHO VCDs with  $0.25^{\circ} \times 0.25^{\circ}$  resolution for three segments (1, 2, 3) of four circling journeys (a, b, c, d). The main cities and counties on the driving routes are marked by the black stars. On the background map, the light blue lines and areas represent rivers and lakes (such as, Qinghai Lake), the yellow lines denote the roads, and the grey lines indicate the administrative boundaries.
